# Supplementary material for: Evaluation of the Cardiovascular Effects of Coriandrum sativum and Citrus limon to Treat Arsenic-Induced Endothelial Damage and Hypertension in Rats
Source: MDPI journal article supplement (doi:10.3390/life12111842), 2022-11-10
Supplement: s1 [file s1]

## Supplementary Figures

Histopathological examination of heart tissue:

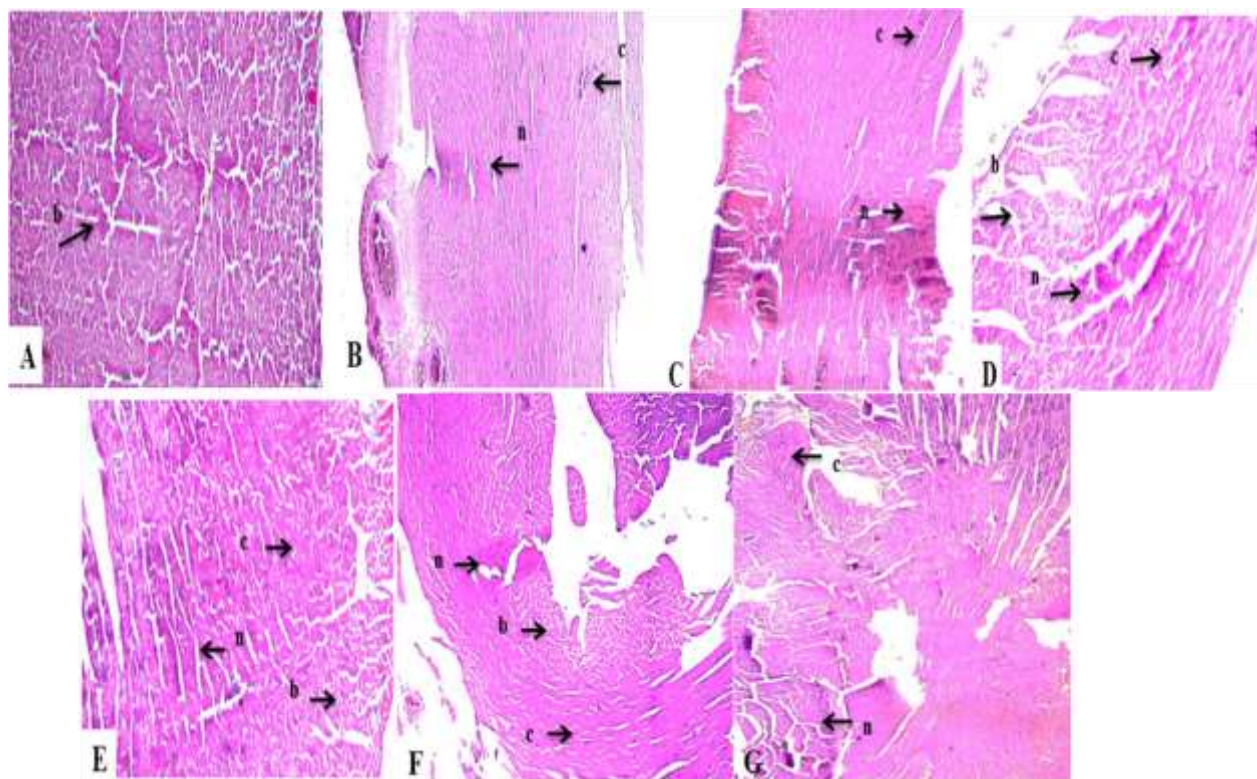

Figure S1: H & E staining of heart tissue of normal (A), diseased (B), Positive control (C), *C. sativum* high dose (D), *C. limon* high dose (E), low dose combination (F) and high dose combination (G).

### Histopathological examination of aorta tissue:

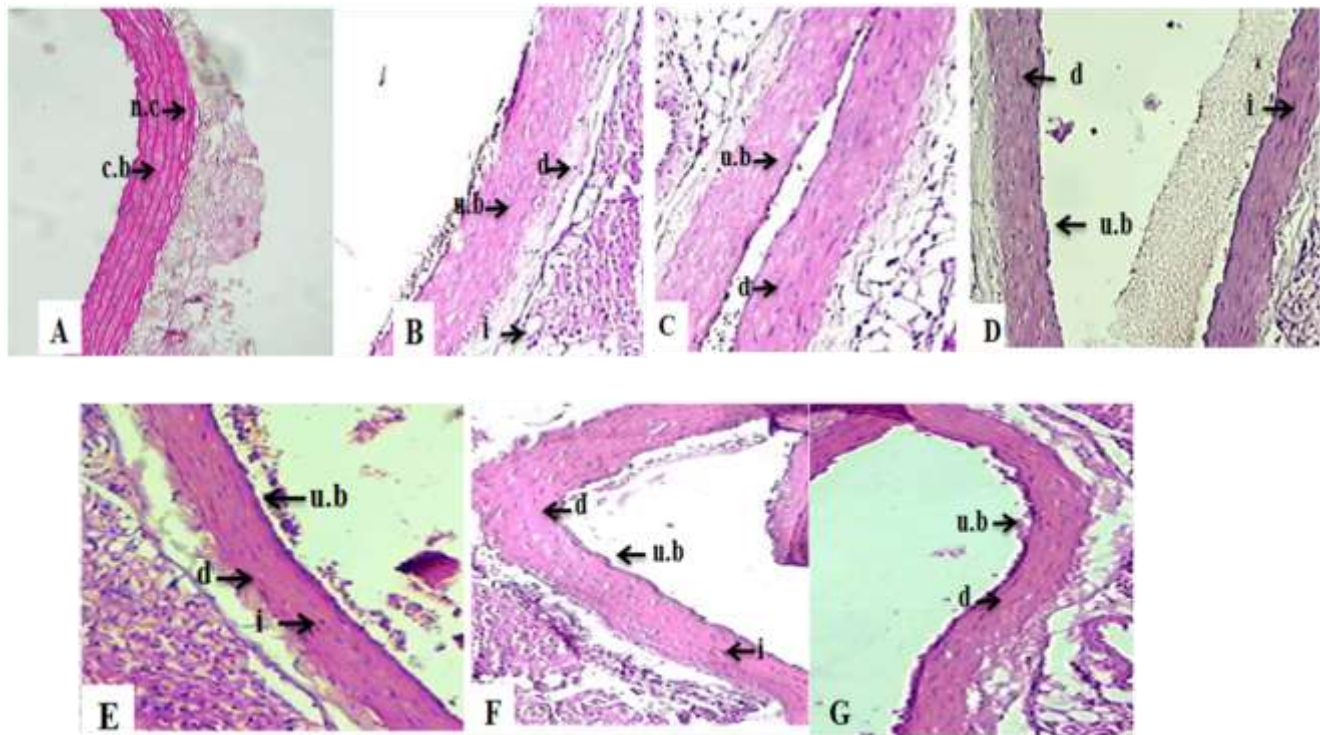

**Figure S2:** H & E staining of aorta tissue of normal (A), diseased (B), Positive control (C), *C. sativum* high dose (D), *C. limon* high dose (E), low dose combination (F) and high dose combination (G)

### Histopathological examination of kidney tissue:

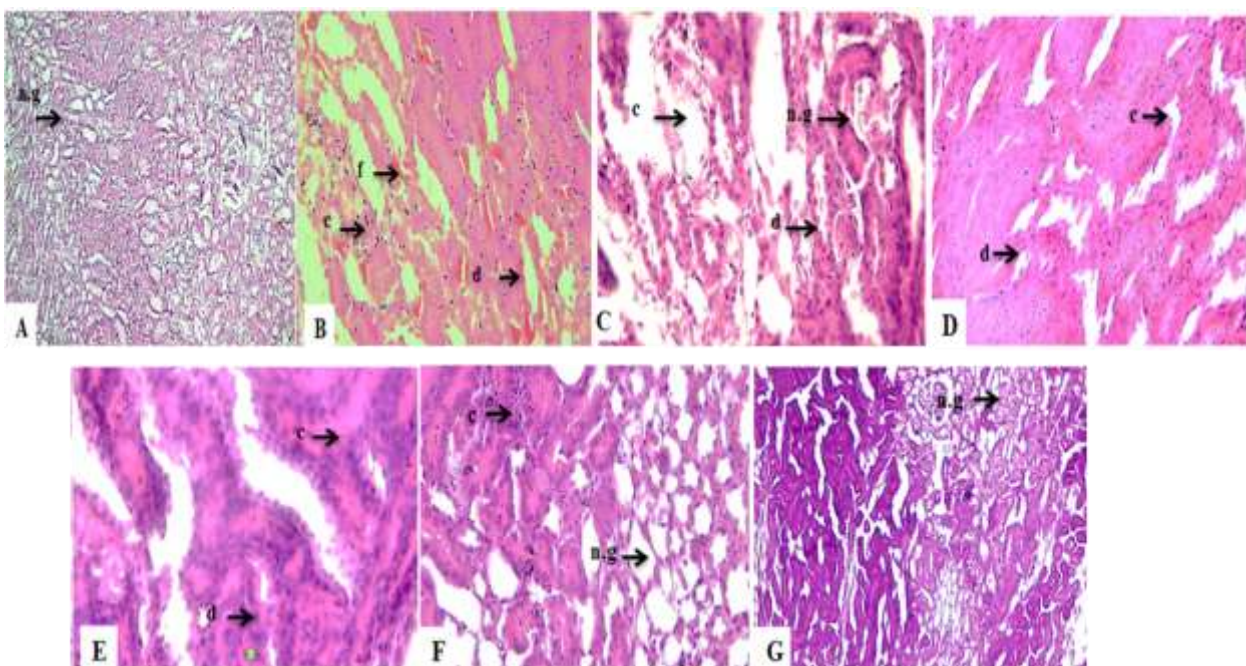

**Figure S3:** H & E staining of kidney tissue of normal (A), diseased (B), Positive control (C), *C. sativum* high dose (D), *C. limon* high dose (E), low dose combination (F) and high dose combination (G)



## Histopathological examination of liver tissue

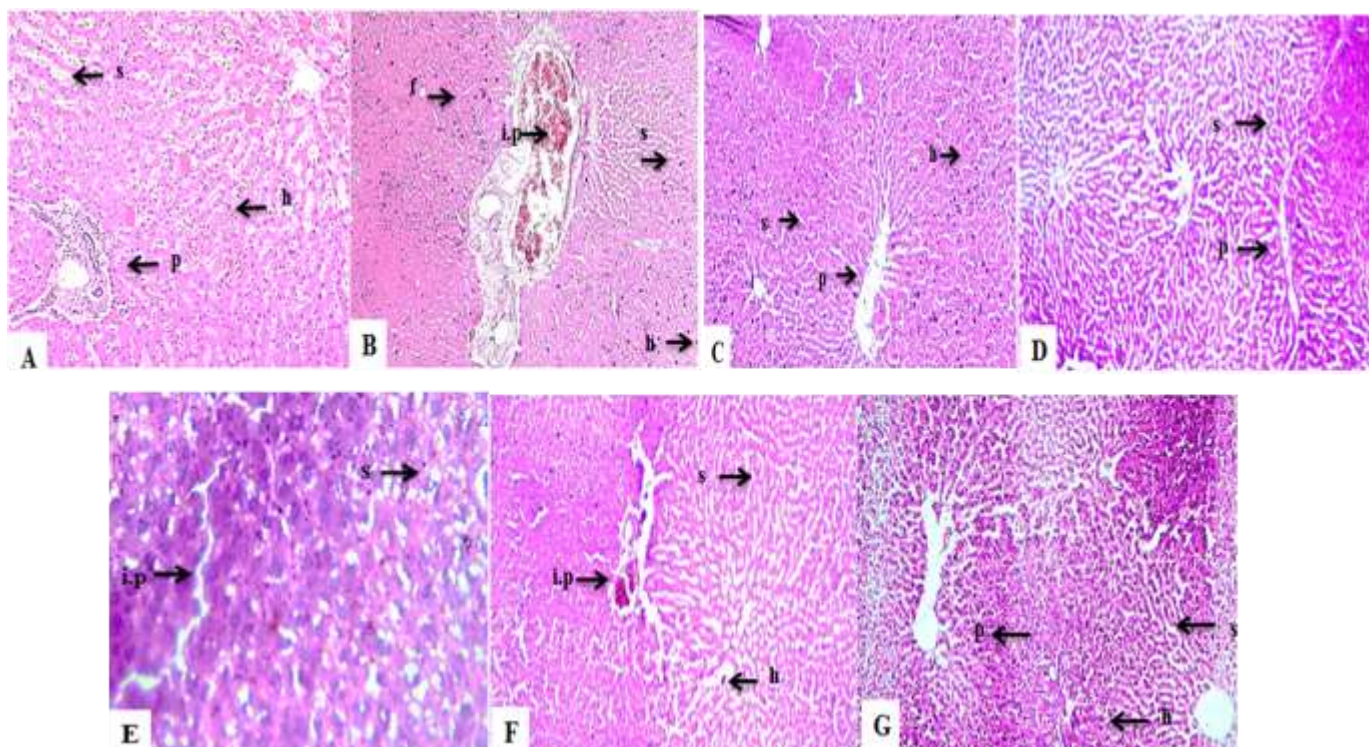

**Figure S4:** H & E staining of liver tissue of normal (A), diseased (B), Positive control (C), *C. sativum* high dose (D), *C. limon* high dose (E), low dose combination (F) and high dose combination (G)
